# Supplementary material for: Assembly of metallo-macrocycles through reductive C–C coupling of alkylnitriles by an Mg–Mg-bonded compound
Source: Royal Society of Chemistry journal article supplement (doi:10.1039/d2dt00181k), 2022-01-01
Supplement: d2dt00181k2.pdf [file d2dt00181k2.pdf]

Electronic Supplementary Information

**Assembly of metallo-macrocycles through reductive C–C  
coupling of alkylnitriles by an Mg–Mg-bonded compound**

Yujie Xue,<sup>a</sup> Jijiang Wang,<sup>a</sup> Yalei Shi,<sup>a</sup> Yanxia Zhao,<sup>a</sup> Wenhua Xu,<sup>a</sup> Biao Wu,<sup>b</sup> and  
Xiao-Juan Yang<sup>a,b\*</sup>

<sup>a</sup> *Key Laboratory of Synthetic and Natural Functional Molecule Chemistry of the Ministry of Education College of Chemistry and Materials Science, Northwest University Xi'an 710069, China*

<sup>b</sup> *Key Laboratory of Medical Molecule Science and Pharmaceutics Engineering, Ministry of Industry and Information Technology, School of Chemistry and Chemical Engineering, Beijing Institute of Technology, Beijing 100081, China. E-mail: yangxj@bit.edu.cn.*

**Table of Contents**

- S1. Experimental details
- S2. X-ray crystallographic analysis
- S3. Theoretical calculations
- S4. References

## S1. Experimental details

### General procedures

All of the reactions and manipulations of air- and moisture-sensitive compounds were carried out under argon or nitrogen with standard Schlenk or drybox techniques. The solvents (toluene, THF, *n*-hexane and DME) were dried using appropriate methods and were distilled under argon prior to use. Tetrahydrofuran-*d*<sub>8</sub> is dried over Na/K alloy. The  $\alpha$ -diimine ligand **L** was prepared according to literature procedures.<sup>1</sup> Sodium metal, anhydrous magnesium chloride (MgCl<sub>2</sub>) *n*-butyronitrile, *n*-pentanenitrile and *n*-hexanenitrile were purchased from Alfa Aesar. NMR spectra were recorded on a Mercury Plus-400 spectrometer. Elemental analyses were performed with an Elementar VarioEL III instrument. IR spectra were recorded using a Nicolet AVATAR 360 FT-IR spectrometer.

**[LMg( $\mu$ -{(N $\equiv$ C-C(CH<sub>2</sub>CH<sub>3</sub>)=C((CH<sub>2</sub>)<sub>2</sub>CH<sub>3</sub>)-NH)}<sub>3</sub>[K<sub>3</sub>(THF)<sub>6</sub>]** (**2**). *n*-Butyronitrile (0.351 mL, 4 mmol) was added to the THF solution of compound **1** (1.0 mmol) prepared in situ by the reaction of  $\alpha$ -diimine ligand **L**, MgCl<sub>2</sub>, and K metal.<sup>2</sup> The mixture was stirred for 3 days, and the color of the solution became lighter and brighter. The reaction mixture was filtered, the filtrate concentrated to about 5 mL, and *n*-hexane was added. The solution was stored at room temperature and yellow crystals of compound **2** were obtained one week later. Crystal yield: 0.678 g (45%). <sup>1</sup>H NMR (400 MHz, THF-*d*<sub>8</sub>, 298 K):  $\delta$ /ppm: 0.46 (t, 9H, CH<sub>3</sub>CH<sub>2</sub>CH<sub>2</sub>-), 0.89 (t, 9H, CH<sub>3</sub>CH<sub>2</sub>C=), 1.02 (d, 36H, (CH<sub>3</sub>)<sub>2</sub>CH-), 1.14 (d, 36H, (CH<sub>3</sub>)<sub>2</sub>CH-), 1.34 (m, 6H, CH<sub>3</sub>CH<sub>2</sub>CH<sub>2</sub>-), 1.53 (s, 18H, CH<sub>3</sub>C-), 1.84 (m, 6H, CH<sub>3</sub>CH<sub>2</sub>CH<sub>2</sub>-), 2.07 (m, 6H, CH<sub>3</sub>CH<sub>2</sub>C=), 3.95(m, 12H, CH(CH<sub>3</sub>)<sub>2</sub>), 4.13 (s, 3H, NH), 6.43 (m, 6H, *p*-C<sub>6</sub>H<sub>3</sub>), 6.74 (m, 12H, *m*-C<sub>6</sub>H<sub>3</sub>); <sup>13</sup>C NMR (100.6 MHz, THF-*d*<sub>8</sub>, 298 K):  $\delta$ /ppm: 13.5 (CH<sub>3</sub>CH<sub>2</sub>CH<sub>2</sub>-), 14.0 (CH<sub>3</sub>CH<sub>2</sub>C=), 17.2, 20.7 ((CH<sub>3</sub>)<sub>2</sub>CH), 23.5 (CH<sub>3</sub>CH<sub>2</sub>CH<sub>2</sub>-), 24.6 (CH<sub>3</sub>C=), 25.7 (CH<sub>3</sub>CH<sub>2</sub>C=), 26.9 (CH<sub>3</sub>CH<sub>2</sub>CH<sub>2</sub>-), 40.7 ((CH<sub>3</sub>)<sub>2</sub>CH), 65.1 (CH<sub>3</sub>CH<sub>2</sub>C=), 116.5 (*p*-C<sub>6</sub>H<sub>3</sub>), 120.2 (*m*-C<sub>6</sub>H<sub>3</sub>), 122.1 (*o*-C<sub>6</sub>H<sub>3</sub>), 130.8 (C $\equiv$ N), 143.6 (*N*-C<sub>6</sub>H<sub>3</sub>), 153.9 (NC=CN), 174.6 (=C-NH); IR (Nujol, KBr,  $\nu$ /cm<sup>-1</sup>): 3291w, 2956w, 2717s, 2120s, 1585w, 1520s, 1460s, 1377s, 1242s, 1051s, 775s. Elemental analysis C<sub>132</sub>H<sub>207</sub>K<sub>3</sub>Mg<sub>3</sub>N<sub>12</sub>O<sub>6</sub> (2248.31): calc. C 70.51, H 9.28, N 7.48%; found: C 70.15, H 9.51, N 7.20%.

**[LMg( $\mu$ -{(N $\equiv$ C-C(CH<sub>2</sub>)<sub>2</sub>CH<sub>3</sub>)=C((CH<sub>2</sub>)<sub>3</sub>CH<sub>3</sub>)-NH)}<sub>3</sub>[K<sub>3</sub>(THF)<sub>6</sub>]** (**3**). 4.0 equiv of *n*-pentanenitrile (0.418 mL, 4 mmol) was added to a stirred deep-red solution of compound **1** (1.0 mmol) in THF. After 3 days, the solvent was concentrated to about 5 mL under reduced pressure, and a few drops of *n*-hexane were added. Red-orange crystals of **3** (yield: 0.782 mg, 50%) suitable for X-ray diffraction were obtained in several days at room temperature. <sup>1</sup>H NMR (400 MHz, THF-*d*<sub>8</sub>, 298 K):  $\delta$ /ppm: 0.56 (t, 9H, CH<sub>3</sub>CH<sub>2</sub>CH<sub>2</sub>CH<sub>2</sub>-), 0.81 (t, 9H, CH<sub>3</sub>CH<sub>2</sub>CH<sub>2</sub>C=), 1.02 (d, 36H, (CH<sub>3</sub>)<sub>2</sub>CH-), 1.14 (d, 36H, (CH<sub>3</sub>)CH<sub>2</sub>-), 1.22 (m, 6H, CH<sub>3</sub>CH<sub>2</sub>CH<sub>2</sub>CH<sub>2</sub>-), 1.32 (m, 12H, CH<sub>3</sub>CH<sub>2</sub>CH<sub>2</sub>C=, CH<sub>3</sub>CH<sub>2</sub>CH<sub>2</sub>CH<sub>2</sub>-), 1.54 (s, 18H, CCH<sub>3</sub>), 1.84 (m, 6H, CH<sub>3</sub>CH<sub>2</sub>CH<sub>2</sub>CH<sub>2</sub>-), 2.13

(m, 6H, CH<sub>3</sub>CH<sub>2</sub>CH<sub>2</sub>C=), 3.95 (m, 12H, CH(CH<sub>3</sub>)<sub>2</sub>), 4.13 (s, 3H, NH), 6.42 (m, 6H, *p*-C<sub>6</sub>H<sub>3</sub>), 6.73 (m, 12H, *m*-C<sub>6</sub>H<sub>3</sub>); <sup>13</sup>C NMR (100.6 MHz, THF-*d*<sub>8</sub>, 298 K): δ/ppm: 14.5 (CH<sub>3</sub>CH<sub>2</sub>CH<sub>2</sub>CH<sub>2</sub>), 14.8 (CH<sub>3</sub>CHCH<sub>2</sub>C=), 17.6, 23.1 ((CH<sub>3</sub>)<sub>2</sub>CH-), 23.5 (CH<sub>3</sub>CH<sub>2</sub>CH<sub>2</sub>CH<sub>2</sub>-), 25.0 (CH<sub>3</sub>CH<sub>2</sub>CH<sub>2</sub>C=), 26.6 (CH<sub>3</sub>C=), 27.3 (CH<sub>3</sub>CH<sub>2</sub>CH<sub>2</sub>CH<sub>2</sub>-), 30.6 (CH<sub>3</sub>CH<sub>2</sub>CH<sub>2</sub>CH<sub>2</sub>-), 33.2 (CH<sub>3</sub>CH<sub>2</sub>CH<sub>2</sub>C=), 39.3 (CH(CH<sub>3</sub>)<sub>2</sub>), 63.6 (CH<sub>3</sub>CH<sub>2</sub>CH<sub>2</sub>C=), 116.8 (*p*-C<sub>6</sub>H<sub>3</sub>), 120.7 (*m*-C<sub>6</sub>H<sub>3</sub>), 122.5 (*o*-C<sub>6</sub>H<sub>3</sub>), 131.2 (C≡N), 143.8 (N-C<sub>6</sub>H<sub>3</sub>), 154.1 (NC=CN), 175.4 (=C-NH); IR (Nujol, KBr, ν/cm<sup>-1</sup>): 3187w, 2924w, 2854s, 2126s, 1516s, 1460s, 1377s, 1240s, 775s. Elemental analysis C<sub>138</sub>H<sub>219</sub>K<sub>3</sub>Mg<sub>3</sub>N<sub>12</sub>O<sub>6</sub> (2332.47): calc. C 71.06, H 9.46, N 7.21 %; found: C 70.57, H 9.12, N 6.86 %.

**[LMg(μ-{(N≡C-C(CH<sub>2</sub>)<sub>3</sub>CH<sub>3</sub>)=C((CH<sub>2</sub>)<sub>4</sub>CH<sub>3</sub>)-NH)}]₃[K<sub>3</sub>(THF)<sub>3</sub>(DME)<sub>2</sub>] (4)**. In a manner similar to the synthesis of **3**, 4.0 equiv of *n*-hexanenitrile (0.480 mL, 4 mmol) was added to a stirred deep-red solution of compound **1** (1 mmol) in THF. After for 2 days, the reaction mixture was filtered, the solution concentrated, and orange-red crystals of product **4** were obtained from a mixed solvent of THF, DME and *n*-hexane. Crystal yield: 0.758 g (48%). <sup>1</sup>H NMR (400 MHz, THF-*d*<sub>8</sub>, 298 K): δ/ppm: 0.68 (t, 9H, CH<sub>3</sub>CH<sub>2</sub>CH<sub>2</sub>CH<sub>2</sub>CH<sub>2</sub>), 0.82 (t, 9H, CH<sub>3</sub>CH<sub>2</sub>CH<sub>2</sub>CH<sub>2</sub>C=), 1.02 (d, 36H, CH(CH<sub>3</sub>)<sub>2</sub>), 1.14 (d, 36H, CH(CH<sub>3</sub>)<sub>2</sub>), 1.20–1.40 (m, 30H, CH<sub>3</sub>CH<sub>2</sub>CH<sub>2</sub>CH<sub>2</sub>CH<sub>2</sub>-, CH<sub>3</sub>CH<sub>2</sub>CH<sub>2</sub>CH<sub>2</sub>C=), 1.54 (s, 18H, CCH<sub>3</sub>), 1.86 (m, 6H, CH<sub>3</sub>CH<sub>2</sub>CH<sub>2</sub>CH<sub>2</sub>CH<sub>2</sub>-), 2.11 (m, 6H, CH<sub>3</sub>CH<sub>2</sub>CH<sub>2</sub>CH<sub>2</sub>C=), 3.27 (m, DME), 3.43 (m, DME), 3.95 (m, 12H, (CH<sub>3</sub>)<sub>2</sub>CH-), 4.12 (s, 3H, NH), 6.43 (m, 6H, *p*-C<sub>6</sub>H<sub>3</sub>), 6.73 (m, 12H, *m*-C<sub>6</sub>H<sub>3</sub>); <sup>13</sup>C NMR (100.6 MHz, THF-*d*<sub>8</sub>, 298K): δ/ppm: 14.7 (CH<sub>3</sub>CH<sub>2</sub>CH<sub>2</sub>CH<sub>2</sub>CH<sub>2</sub>-), 14.8 (CH<sub>3</sub>CH<sub>2</sub>CH<sub>2</sub>CH<sub>2</sub>C=), 17.6, 23.6 ((CH<sub>3</sub>)<sub>2</sub>CH-), 23.8 (CH<sub>3</sub>CH<sub>2</sub>CH<sub>2</sub>CH<sub>2</sub>CH<sub>2</sub>), 25.0 (CH<sub>3</sub>CH<sub>2</sub>CH<sub>2</sub>CH<sub>2</sub>C=), 26.0 (CH<sub>3</sub>CH<sub>2</sub>CH<sub>2</sub>CH<sub>2</sub>CH<sub>2</sub>-), 27.3 (CH<sub>3</sub>CH<sub>2</sub>CH<sub>2</sub>CH<sub>2</sub>C=), 28.2 (CCH<sub>3</sub>), 30.9 (CH<sub>3</sub>CH<sub>2</sub>CH<sub>2</sub>CH<sub>2</sub>CH<sub>2</sub>-), 32.3 (CH<sub>3</sub>CH<sub>2</sub>CH<sub>2</sub>CH<sub>2</sub>CH<sub>2</sub>), 32.7 (CH<sub>3</sub>CH<sub>2</sub>CH<sub>2</sub>CH<sub>2</sub>C=), 39.5 ((CH<sub>3</sub>)<sub>2</sub>CH-), 59.1 (DME), 63.7 (CH<sub>3</sub>CH<sub>2</sub>CH<sub>2</sub>CH<sub>2</sub>C=), 72.9 (DME), 116.8 (*p*-C<sub>6</sub>H<sub>3</sub>), 120.7 (*m*-C<sub>6</sub>H<sub>3</sub>), 122.5 (*o*-C<sub>6</sub>H<sub>3</sub>), 131.5 (C≡N), 143.8 (N-C<sub>6</sub>H<sub>3</sub>), 154.1 (NC=CN), 175.3 (=C-NH); IR (Nujol, KBr, ν/cm<sup>-1</sup>): 3180w, 2924w, 2854s, 2127s, 1516s, 1462s, 1377s, 1240s, 775s, 723s. Elemental analysis C<sub>140</sub>H<sub>227</sub>K<sub>3</sub>Mg<sub>3</sub>N<sub>12</sub>O<sub>7</sub> (2380.55): calc. C 70.63, H 9.61, N 7.06%; found: C 70.21, H 9.38, N 7.39%.

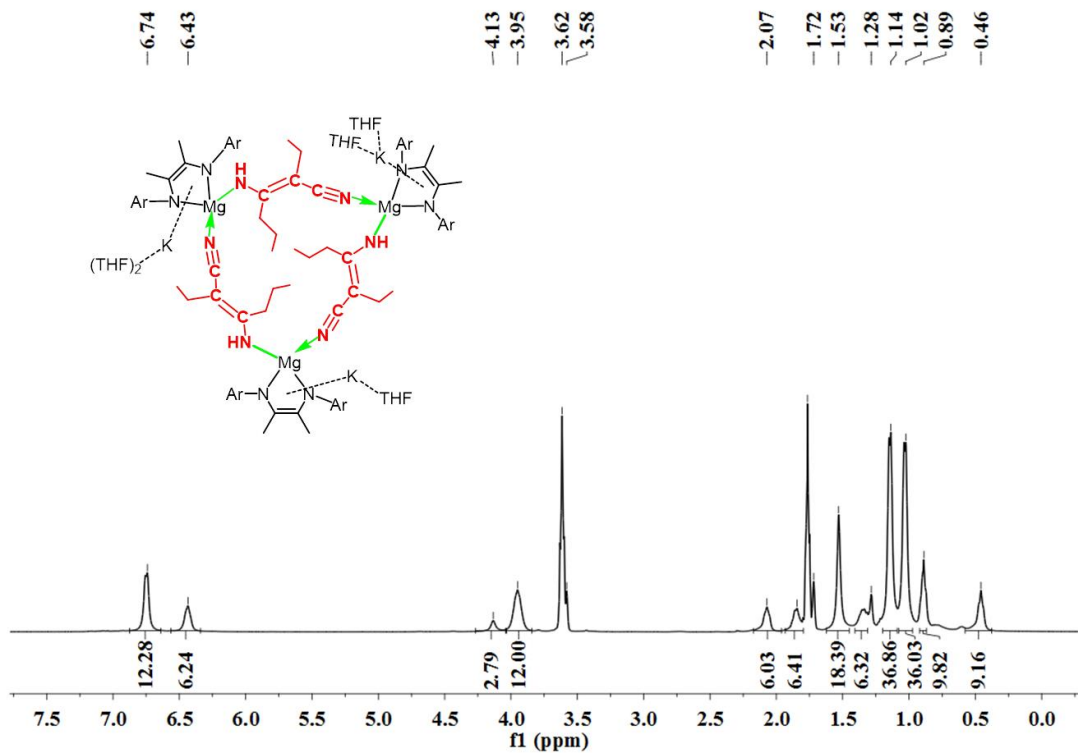

Fig. S1. <sup>1</sup>H NMR spectrum of compound 2 in THF-d<sub>8</sub>.

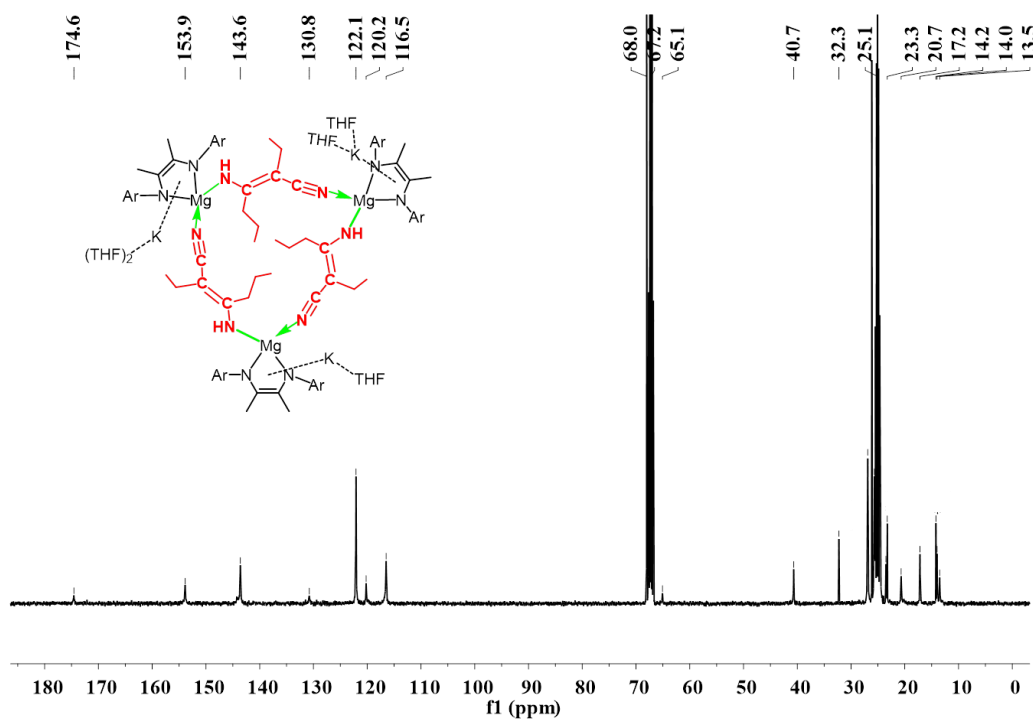

Fig. S2. <sup>13</sup>C NMR spectrum of compound 2 in THF-d<sub>8</sub>.

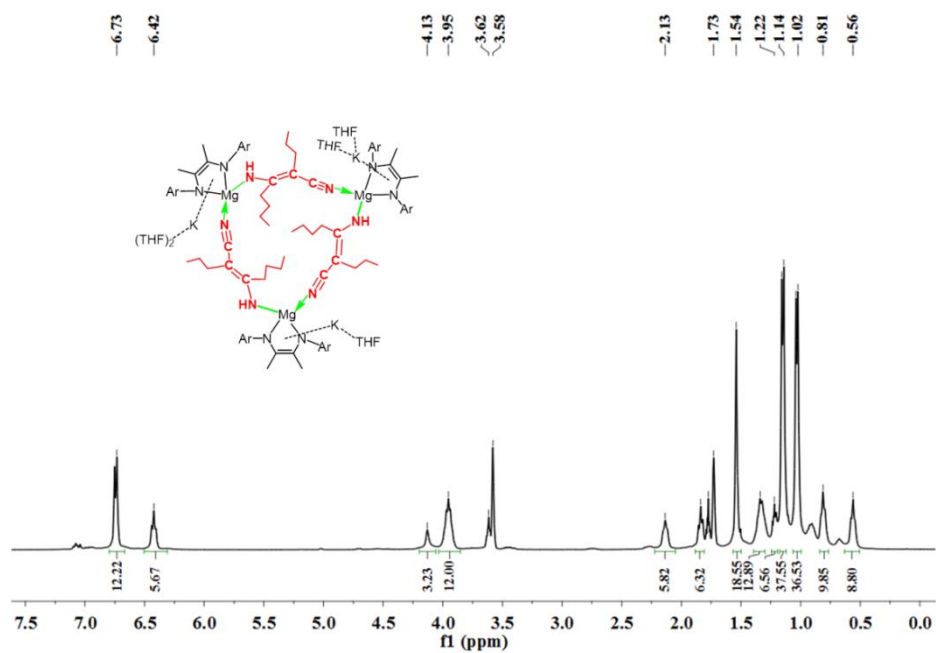

Fig. S3. <sup>1</sup>H NMR spectrum of compound 3 in THF-*d*<sub>8</sub>.

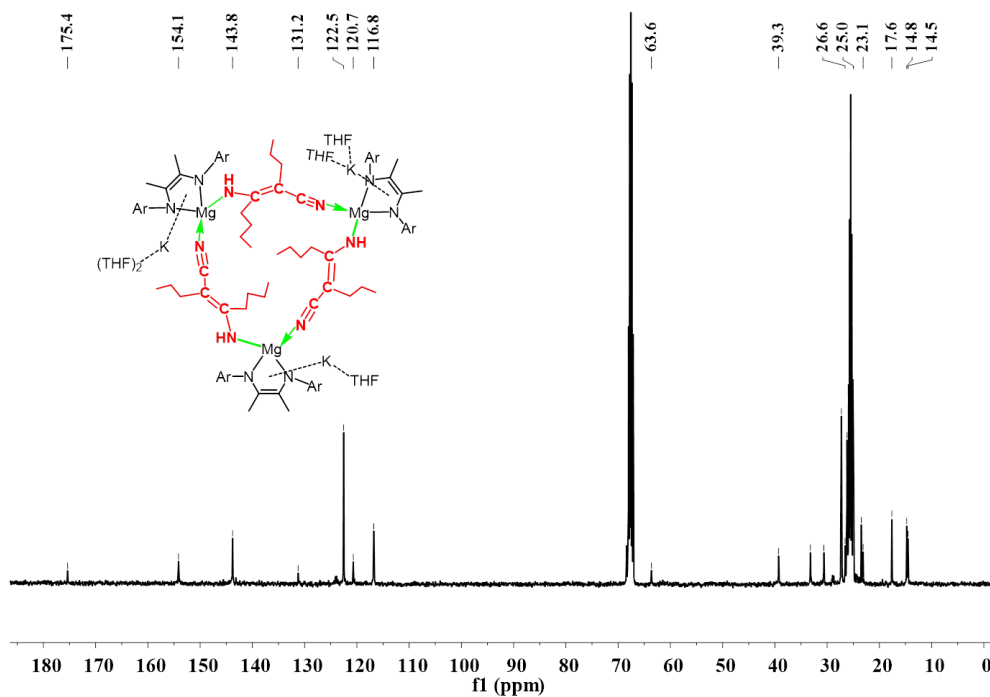

Fig. S4. <sup>13</sup>C NMR spectrum of compound 3 in THF-*d*<sub>8</sub>.

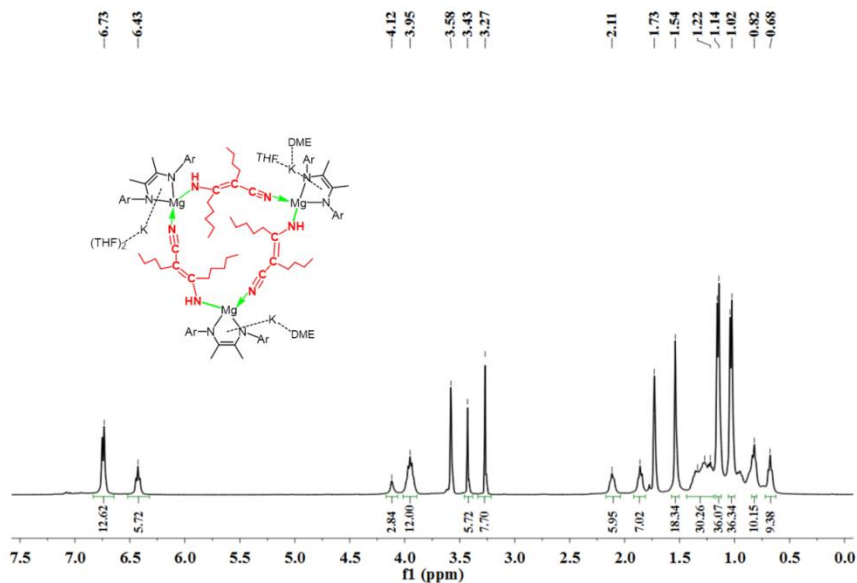

Fig. S5. <sup>1</sup>H NMR spectrum of compound 4 in THF-*d*<sub>8</sub>.

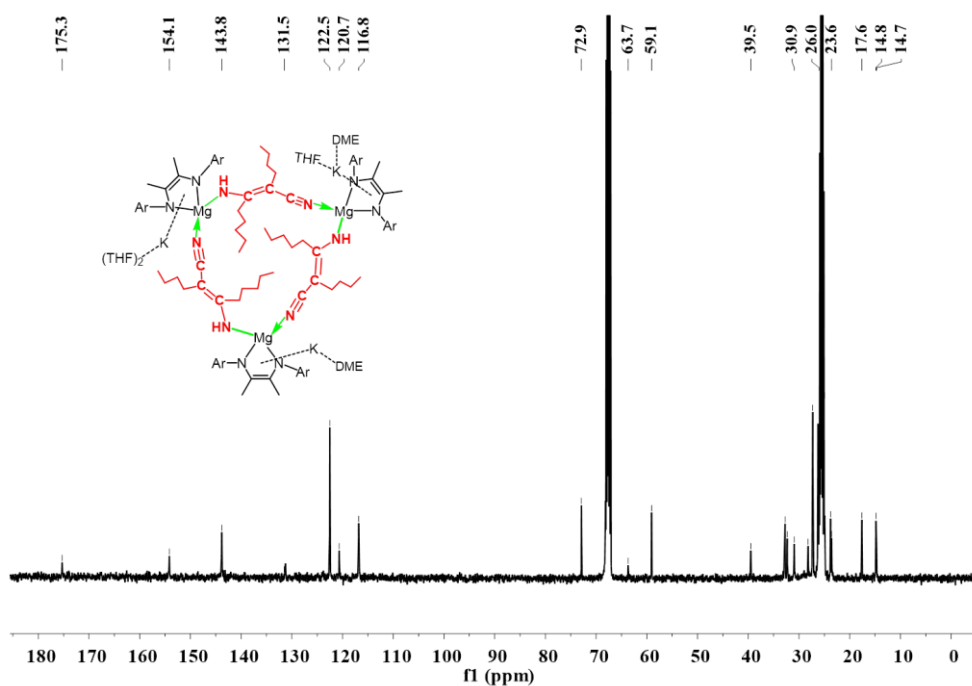

Fig. S6. <sup>13</sup>C NMR spectrum of compound 4 in THF-*d*<sub>8</sub>.

## S2. X-ray crystallographic analysis

Diffraction data for complexes 2–4 were collected on a Bruker SMART APEX II diffractometer at 153 K with graphite-monochromated Mo K $\alpha$  radiation ( $\lambda = 0.71073 \text{ \AA}$ ). An empirical absorption correction using SADABS was applied for all data.<sup>3</sup> The structures were solved and refined to convergence on  $F^2$  for all independent reflections by the full-matrix least

squares method using the SHELXL-2014 programs<sup>4</sup> and OLEX2 1.2.<sup>5</sup> Some atoms in THF and alkyl chain are disordered and display unusual thermal parameters, which caused the level B alerts. In compounds **2**, **3** and **4**, about 5.0, 4.7 and 3.1 molecules of THF (about 1 THF molecules per formula,  $Z = 4$  (in **2** and **3**),  $Z = 2$  (in **4**)) are co-crystallized, with the corresponding electron density (198, 188 and 124 electrons in **2**, **3**, **4**) being removed using the SQUEEZE routine implemented within the software program PLATON,<sup>6</sup> and the resulting .fab file was processed with OLEX2 1.2 using the ABIN instruction. Crystallographic data and refinement details for compounds **2–4** are given in Table S1.

CCDC numbers 2121995 (for **2**), 2121996 (for **3**) and 2121997 (for **4**). These data can be obtained free of charge from the Cambridge Crystallographic Data Centre [www.ccdc.cam.ac.uk/data\\_request/cif](http://www.ccdc.cam.ac.uk/data_request/cif).

**Table S1.** Crystallographic data and refinement details for compounds **2–4**.

| compound                                                                             | <b>2</b>                                                                                        | <b>3</b>                                                                                        | <b>4</b>                                                                                        |
|--------------------------------------------------------------------------------------|-------------------------------------------------------------------------------------------------|-------------------------------------------------------------------------------------------------|-------------------------------------------------------------------------------------------------|
| formula                                                                              | C <sub>132</sub> H <sub>207</sub> K <sub>3</sub> Mg <sub>3</sub> N <sub>12</sub> O <sub>6</sub> | C <sub>138</sub> H <sub>219</sub> K <sub>3</sub> Mg <sub>3</sub> N <sub>12</sub> O <sub>6</sub> | C <sub>140</sub> H <sub>227</sub> K <sub>3</sub> Mg <sub>3</sub> N <sub>12</sub> O <sub>7</sub> |
| Mw                                                                                   | 2248.31                                                                                         | 2332.47                                                                                         | 2380.55                                                                                         |
| crystal system                                                                       | monoclinic                                                                                      | monoclinic                                                                                      | triclinic                                                                                       |
| space group                                                                          | <i>Cc</i>                                                                                       | <i>Cc</i>                                                                                       | <i>P-1</i>                                                                                      |
| <i>a</i> (Å)                                                                         | 29.600(15)                                                                                      | 29.376(8)                                                                                       | 14.10(3)                                                                                        |
| <i>b</i> (Å)                                                                         | 21.925(11)                                                                                      | 21.502(6)                                                                                       | 17.32(3)                                                                                        |
| <i>c</i> (Å)                                                                         | 22.450(11)                                                                                      | 23.225(7)                                                                                       | 34.45(6)                                                                                        |
| $\alpha$ (°)                                                                         | 90                                                                                              | 90                                                                                              | 95.42(4)                                                                                        |
| $\beta$ (°)                                                                          | 94.340(17)                                                                                      | 95.674(10)                                                                                      | 97.06(4)                                                                                        |
| $\gamma$ (°)                                                                         | 90                                                                                              | 90                                                                                              | 108.92(4)                                                                                       |
| <i>V</i> (Å <sup>3</sup> )                                                           | 14527(12)                                                                                       | 14598(7)                                                                                        | 7817(25)                                                                                        |
| <i>Z</i>                                                                             | 4                                                                                               | 4                                                                                               | 2                                                                                               |
| <i>D</i> <sub>calc</sub> /g cm <sup>-3</sup>                                         | 1.028                                                                                           | 1.061                                                                                           | 1.011                                                                                           |
| <i>F</i> (000)                                                                       | 4896                                                                                            | 5088                                                                                            | 2600                                                                                            |
| $\mu$ /mm <sup>-1</sup>                                                              | 0.158                                                                                           | 0.159                                                                                           | 0.150                                                                                           |
| $\theta$ range                                                                       | 2.314-25.000                                                                                    | 2.175-25.000                                                                                    | 2.38-24.26                                                                                      |
| total reflns                                                                         | 24405                                                                                           | 24903                                                                                           | 28510                                                                                           |
| unique reflns                                                                        | 17059                                                                                           | 22450                                                                                           | 14110                                                                                           |
| <i>R</i> (int)                                                                       | 0.0603                                                                                          | 0.0407                                                                                          | 0.0857                                                                                          |
| <i>R</i> <sub>1</sub> , <i>wR</i> <sub>2</sub> [ <i>I</i> > 2 $\sigma$ ( <i>I</i> )] | 0.0774, 0.2141                                                                                  | 0.0544, 0.15152                                                                                 | 0.1148, 0.2297                                                                                  |
| <i>R</i> <sub>1</sub> , <i>wR</i> <sub>2</sub> (all data)                            | 0.1072, 0.2373                                                                                  | 0.0610, 0.1579                                                                                  | 0.1964, 0.2609                                                                                  |
| GOF ( <i>F</i> <sup>2</sup> )                                                        | 1.045                                                                                           | 1.047                                                                                           | 1.129                                                                                           |

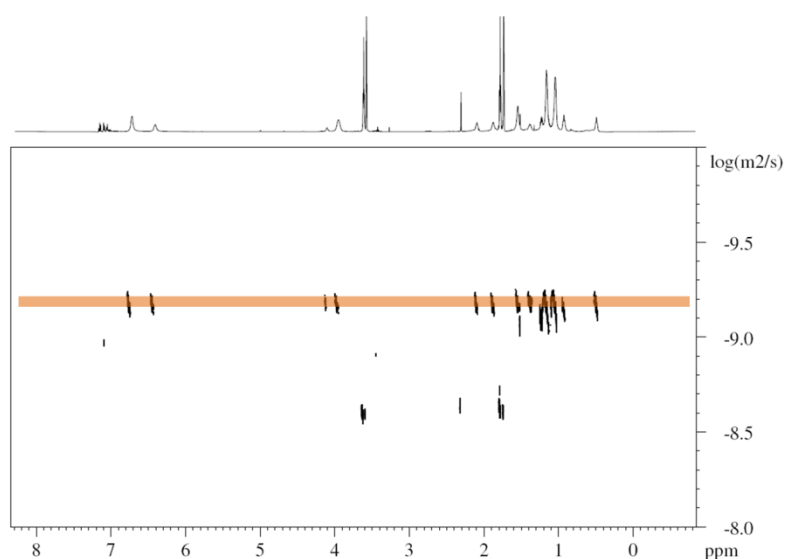

**Fig. S7.** DOSY spectrum (400 MHz, THF-*d*<sub>8</sub>, 298 K,  $\log D = -9.20$ ) of **2**.

Diffusion coefficients and hydrodynamic radii are correlated theoretically by the Stokes-Einstein Relation (**Equation S1**):  $r = \frac{kT}{6\pi\eta D}$  where  $D$  is the diffusion coefficient ( $10^{-9.20} = 6.31 \times 10^{-10}$  obtained from Fig. S7),  $k$  is the Boltzmann constant  $1.38 \times 10^{-23} \text{ m}^2 \text{ kg s}^{-2} \text{ K}^{-1}$ ,  $T$  is the temperature in Kelvin (298 K),  $\eta$  is the viscosity of the solvent (THF  $5.01 \times 10^{-4} \text{ kg m}^{-1} \text{ s}^{-1}$ )<sup>3</sup>, and  $r$  is the radius of the molecular sphere.

$$r(\mathbf{3}) = 1.38 \times 10^{-23} \times 298 / (6 \times 3.14 \times 5.01 \times 10^{-4} \times 6.31 \times 10^{-10}) = 6.91 \times 10^{-10} \text{ m} = 6.91 \text{ \AA}$$

### S3. Theoretical Calculations

Structure optimization for the model compounds  $[\text{L}'\text{Mg}(\mu\text{-}\{\text{N}\equiv\text{CC}(\text{CH}_2\text{CH}_3)\text{-C}=\{(\text{CH}_2)_2\text{CH}_3\}\text{-NH}\})_3[\text{K}_3(\text{H}_2\text{O})_6]$  (**2**),  $[\text{L}'\text{MgN}\equiv\text{C}\{(\text{CH}_2)_3\text{CH}_3\}\text{C}\{(\text{CH}_2)_2\text{CH}_3\}=\text{C-NH}\}_3[\text{K}_3(\text{H}_2\text{O})_6]$  (**3**) and  $[\text{L}'\text{MgN}\equiv\text{C}\{(\text{CH}_2)_4\text{CH}_3\}\text{C}\{(\text{CH}_2)_3\text{CH}_3\}=\text{C-NH}\}_3[\text{K}_3(\text{H}_2\text{O})_7]$  (**4**), in which the 2,6-*i*Pr<sub>2</sub>C<sub>6</sub>H<sub>3</sub> groups in L were replaced by Ph groups, was carried out at the DFT (B3LYP) level with a 6-31G\*<sup>7,8</sup> basis set using the Gaussian 09 program.<sup>9</sup> Figures S7 show the optimized geometries, which reproduce the experimental data of **2–4** reasonably well. The atomic populations, bonding orbitals and Wiberg bond orders were obtained with NBO method.<sup>10-12</sup>



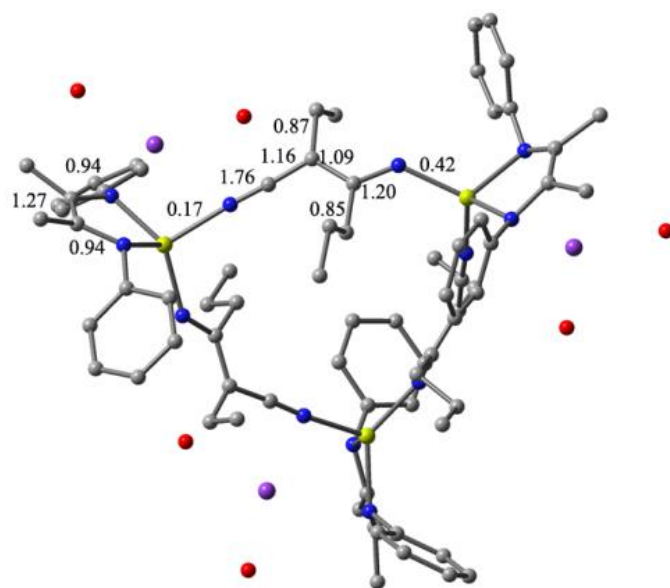

**2H**

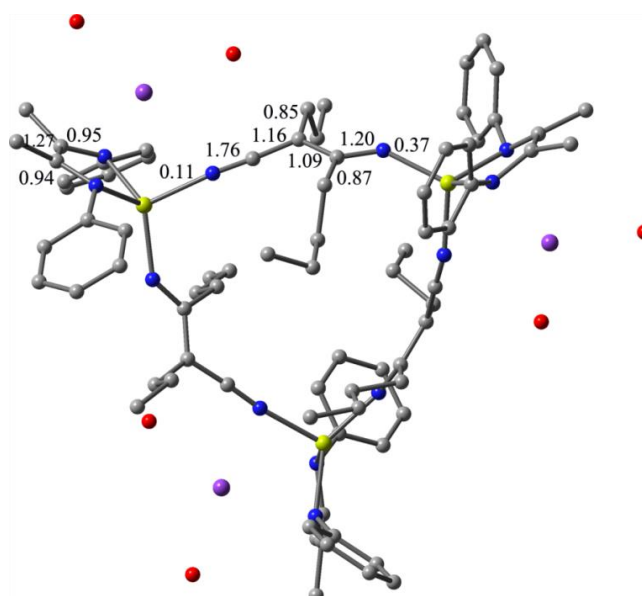

**3H**

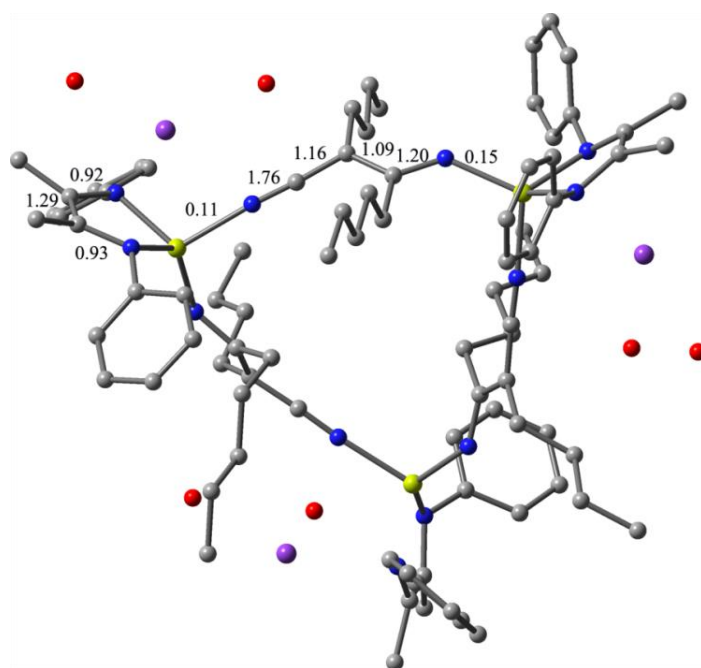

**4H**

**Fig. S8.** Optimized structures of **2H–4H** labelled with selected bond orders.

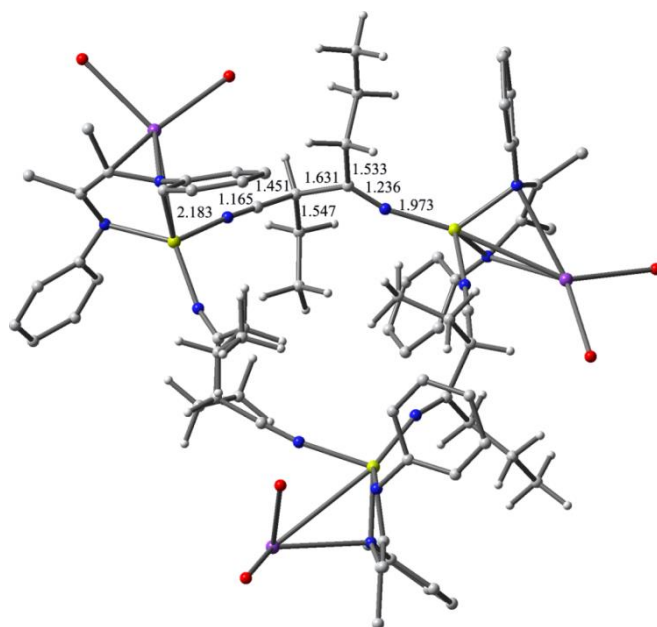

Intermediate  $[\text{LMg}(\mu\text{-}\{\text{N}\equiv\text{CCH}(\text{CH}_2\text{CH}_3)\text{C}((\text{CH}_2)_2\text{CH}_3)=\text{N}\})]_3[\text{K}_3(\text{H}_2\text{O})_6]$  (**6311.9913 au**)

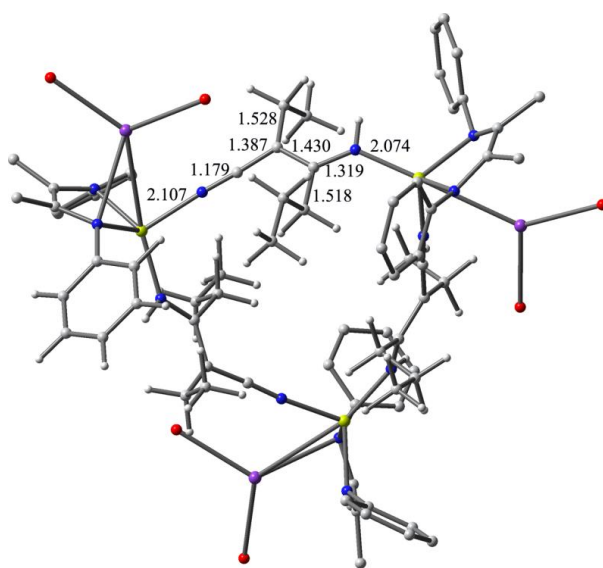

**2H** (6312.1144 au)

**Fig. S9.** Optimized structures of **Intermediate**  $[\text{LMg}(\mu\text{-}\{\text{N}=\text{CCH}(\text{CH}_2\text{CH}_3)\text{-C}((\text{CH}_2)_2\text{CH}_3)=\text{N}\})_3[\text{K}_3(\text{H}_2\text{O})_6]$  and **2H** labelled with selected bond lengths and calculated energies.

**Table S2.** Natural charges of the model compounds **2H**, **3H** and **4H**.

|                          | <b>2H</b> | <b>3H</b> | <b>4H</b> |
|--------------------------|-----------|-----------|-----------|
| Mg                       | 1.69      | 1.69      | 1.69      |
| L                        | -1.77     | -1.77     | -1.77     |
| amido-ene-nitrile moiety | -0.84     | -0.84     | -0.84     |

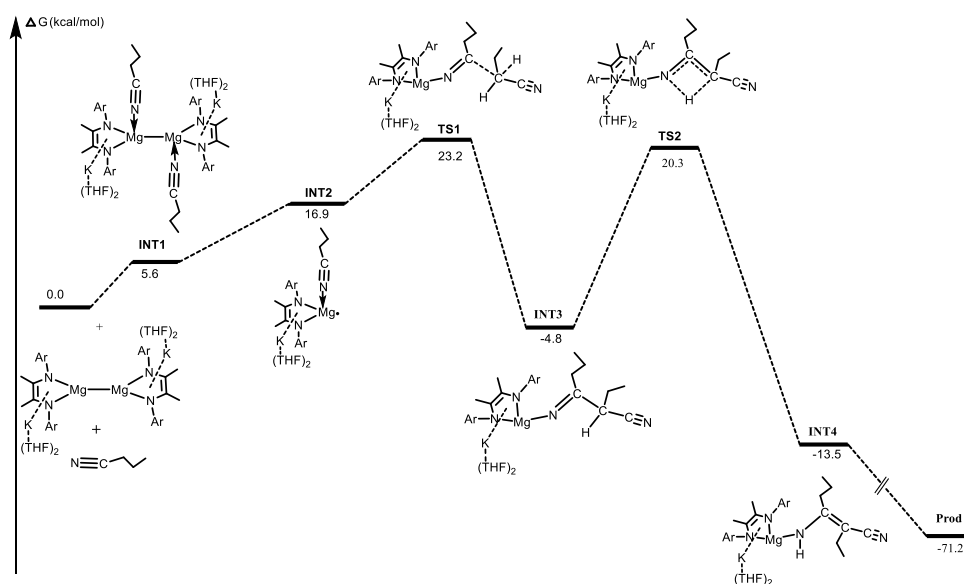

**Fig. S10.** Computed reaction Gibbs free energy profile (in kcal/mol) for the formation of **2**.

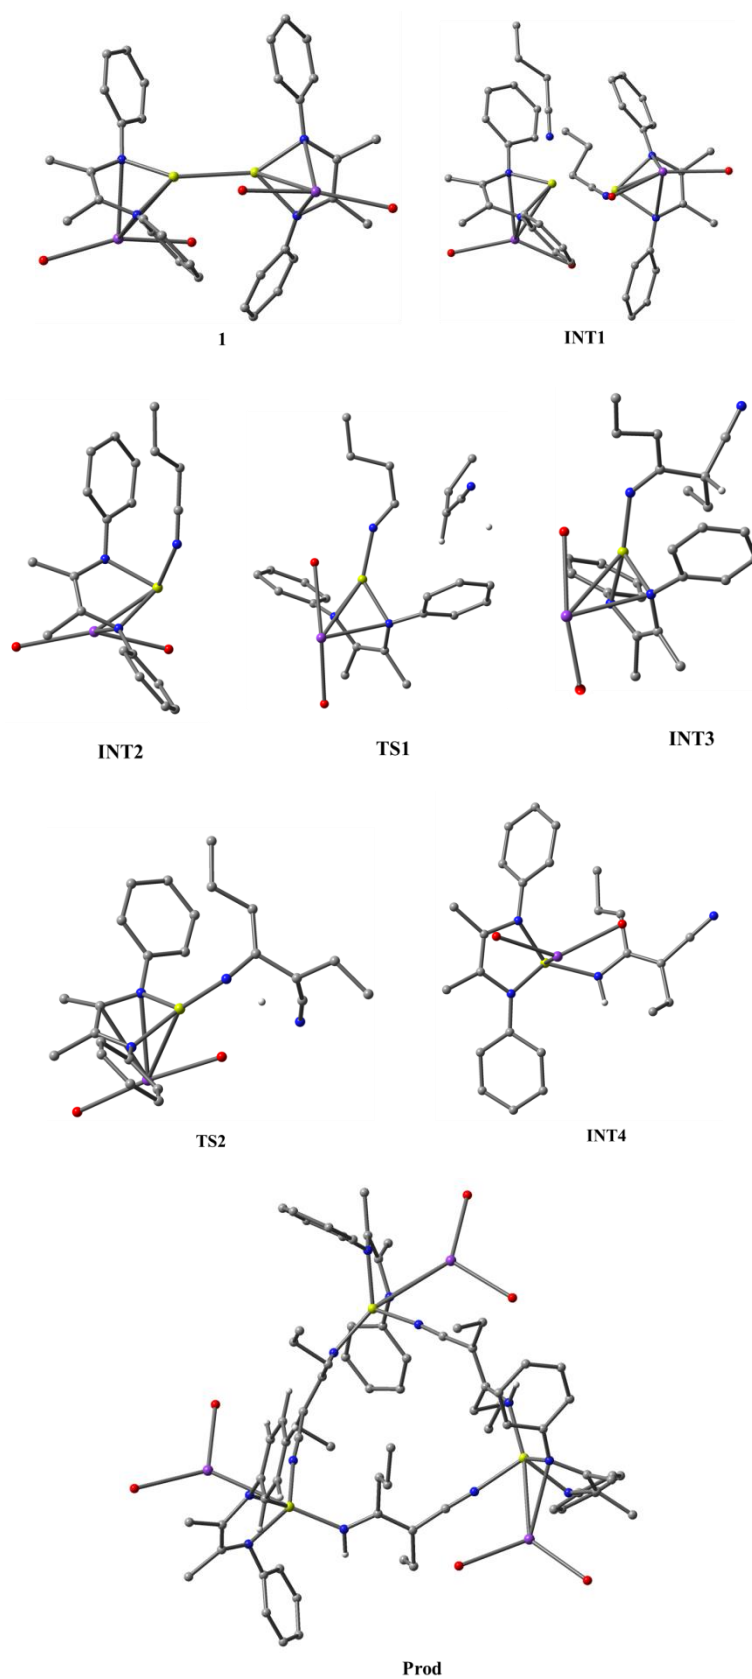

**Fig. S11.** Optimized structures of intermediate and transition states.

#### S4. Reference

- 1 H. A. Zhong, J. A. Labinger and J. E. Bercaw, *J. Am. Chem. Soc.*, 2002, **124**, 1378–1399.
- 2 Y. Liu, S. Li, X.-J. Yang, P. Yang and B. Wu, *J. Am. Chem. Soc.*, 2009, **131**, 4210–4211.
- 3 G. M. Sheldrick, Program SADABS: Area-Detector Absorption Correction, 1996, University of Göttingen, Germany.
- 4 G. M. Sheldrick, *Acta Crystallogr., Sect. C: Cryst. Struct. Commun.*, 2015, **71**, 3–8.
- 5 O. V. Dolomanov, L. J. Bourhis, R. J. Gildea, J. A. K. Howard and H. Puschmann, *J. Appl. Cryst.*, 2009, **42**, 339–341.
- 6 A. L. Spek, *Acta Cryst.*, 2015, C71, 9–18.
- 7 A. D. Becke, *J. Chem. Phys.*, 1993, **98**, 5648–5652.
- 8 C. Lee, W. Yang and R. G. Parr, *Phys. Rev. B.*, 1988, **37**, 785–789.
- 9 Gaussian 09, Revision C.1, M. J. Frisch, G. W. Trucks, H. B. Schlegel, G. E. Scuseria, M. A. Robb, J. R. Cheeseman, G. Scalmani, V. Barone, B. Mennucci, G. A. Petersson, H. Nakatsuji, M. Caricato, X. Li, H. P. Hratchian, A. F. Izmaylov, J. Bloino, G. Zheng, J. L. Sonnenberg, M. Hada, M. Ehara,; K. Toyota, R. Fukuda, J. Hasegawa, M. Ishida, T. Nakajima, Y. Honda, O. Kitao, H. Nakai, T. Vreven, Jr., J. A. Montgomery, J. E. Peralta, F. Ogliaro, M. Bearpark, J. J. Heyd, E. Brothers, K. N. Kudin, V. N. Staroverov, R. Kobayashi, J. Normand, K. Raghavachari, A. Rendell, J. C. Burant, S. S. Iyengar, J. Tomasi, M. Cossi, N. Rega, J. M. Millam, M. Klene, J. E. Knox, J. B. Cross, V. Bakken, C. Adamo, J. Jaramillo, R. Gomperts, R. E. Stratmann, O. Yazyev, A. J. Austin, R. Cammi, C. Pomelli, J. W. Ochterski, R. L. Martin, K. Morokuma, V. G. Zakrzewski, G. A. Voth, P. Salvador, J. J. Dannenberg, S. Dapprich, A. D. Daniels, Ö. Farkas, J. B. Foresman, J. V. Ortiz, J. Cioslowski and D. J. Fox, Gaussian, Inc., Wallingford CT, 2009.
- 10 O. V. Sizova, L. V. Skripnikov, A. Y. Sokolov and *J. Mol. Struct.: THEOCHEM*, 2008, **870**, 1–9.
- 11 A. E. Reed, L. A. Curtiss and F. Weinhold, *Chem. Rev.*, 1988, **88**, 899–926.
- 12 K. B. Wiberg, *Tetrahedron*, 1968, **24**, 1083–1096.
